# Supplementary material for: Cul4A Modulates Invasion and Metastasis of Lung Cancer through Regulation of ANXA10
Source: MDPI journal article supplement (doi:10.3390/cancers11050618), 2019-05-02
Supplement: s1 [file s1]

## Cul4A Modulates Invasion and Metastasis of Lung Cancer Through Regulation of ANXA10

Ming-Szu Hung, Yi-Chuan Chen, Paul-Yann Lin, Ya-Chin Li, Chia-Chen Hsu, Jr-Hau Lung, Liang You, Zhidong Xu, Jian-Hua Mao, David M. Jablons and Cheng-Ta Yang

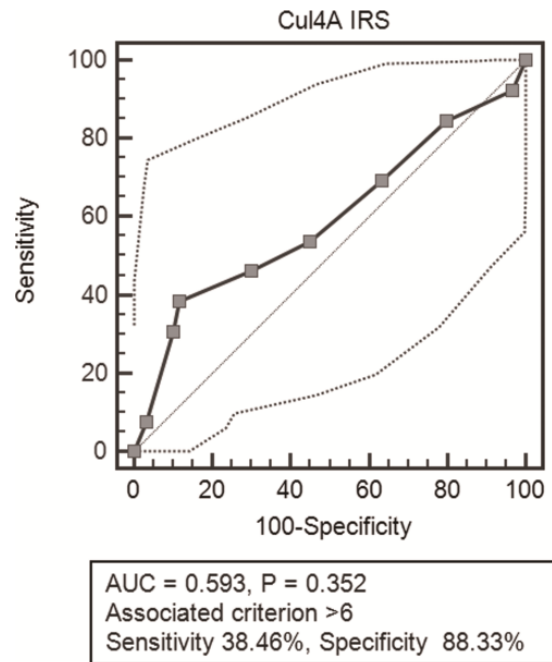

Figure S1. ROC curve of the Cul4A IRS.
