# Supplementary material for: Cul4A Modulates Invasion and Metastasis of Lung Cancer through Regulation of ANXA10
Source: MDPI journal article supplement (doi:10.3390/cancers11050618), 2019-05-02

Figure 2A

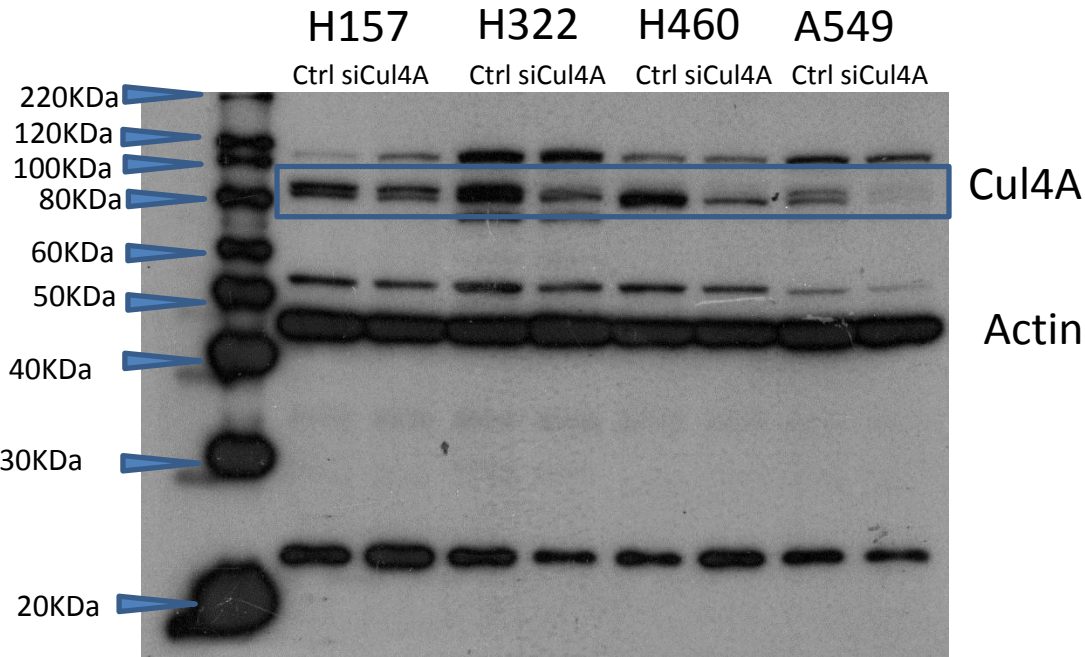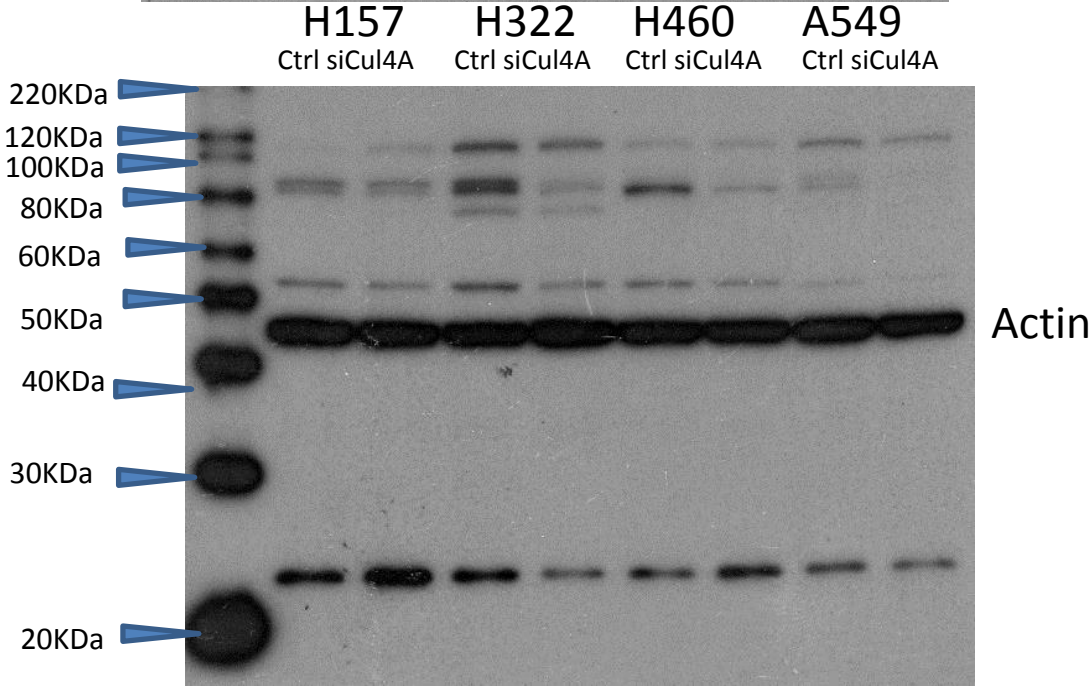

Figure 2A

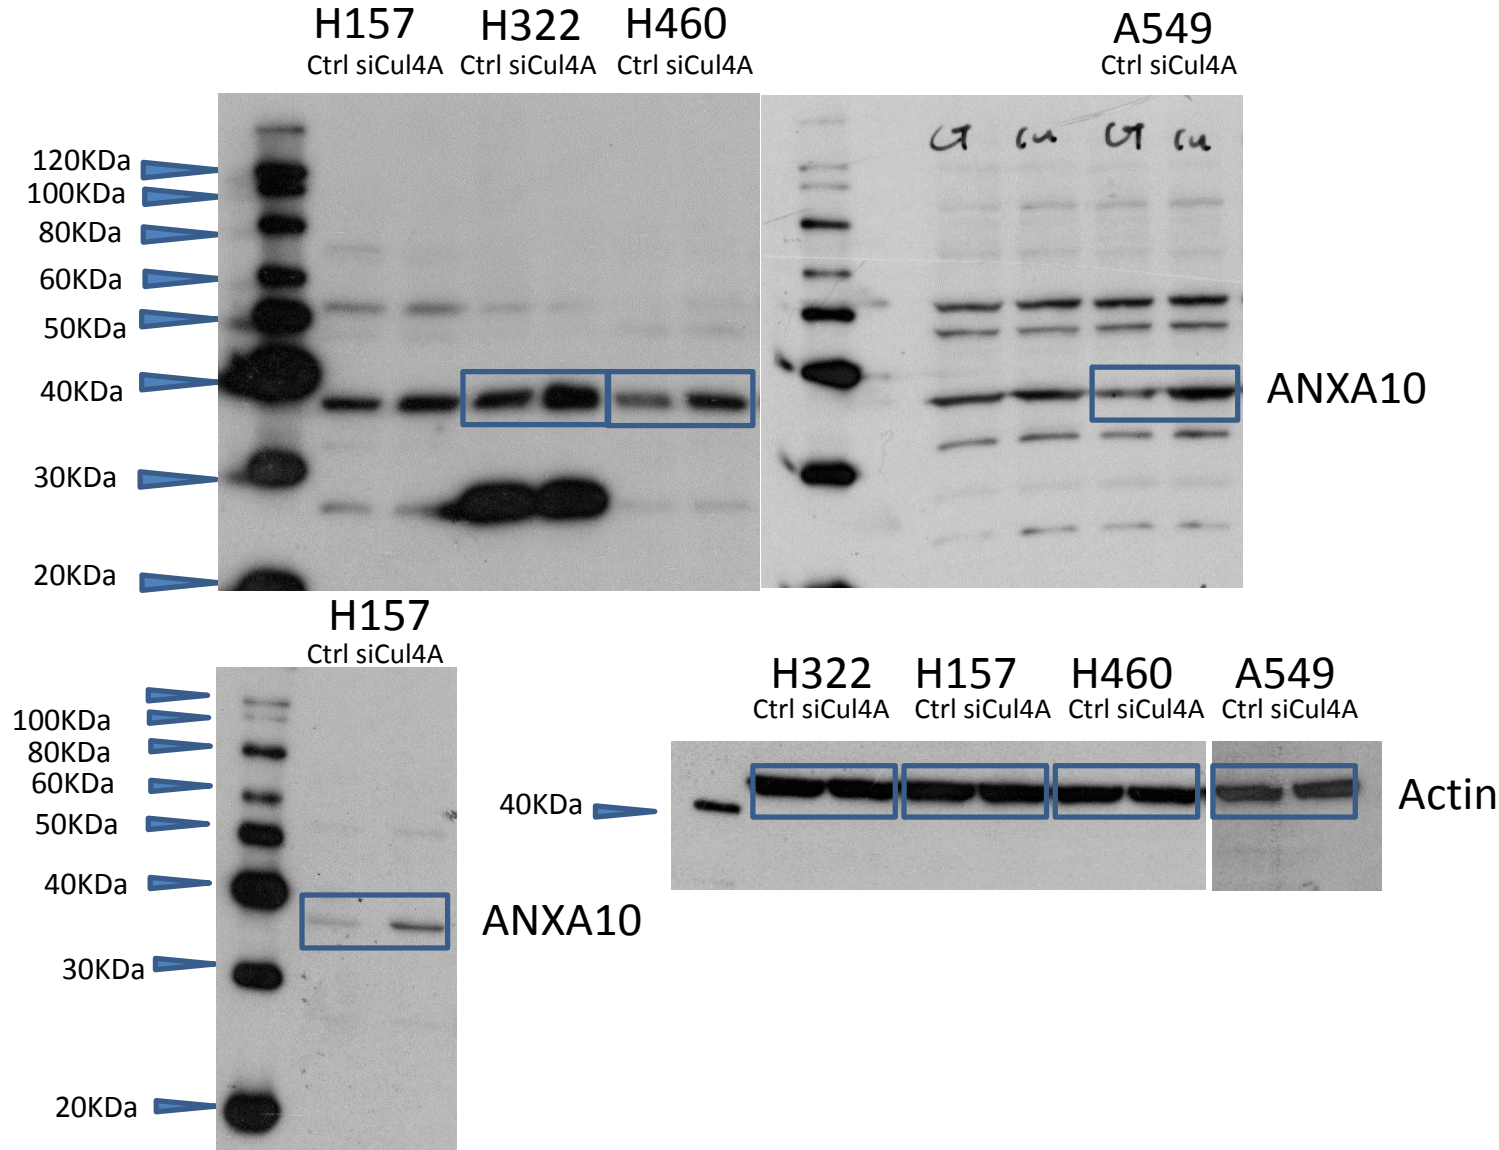

**Figure 2C**

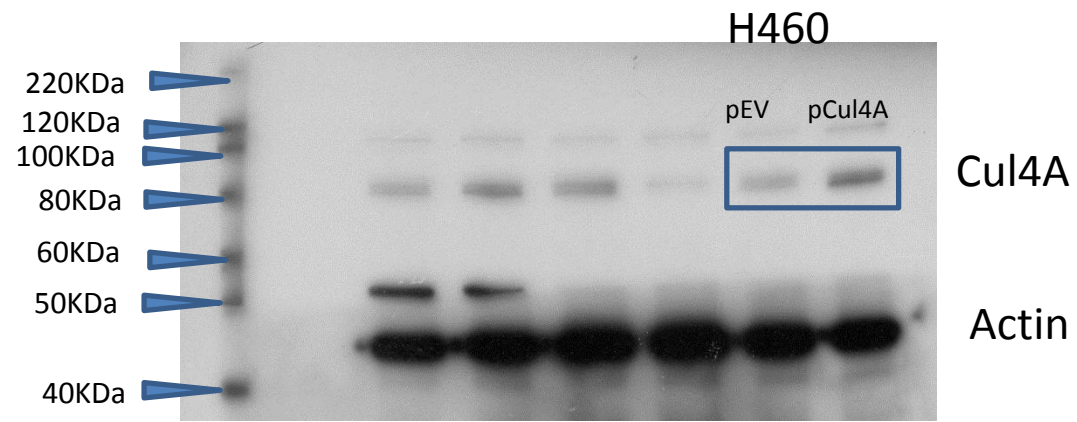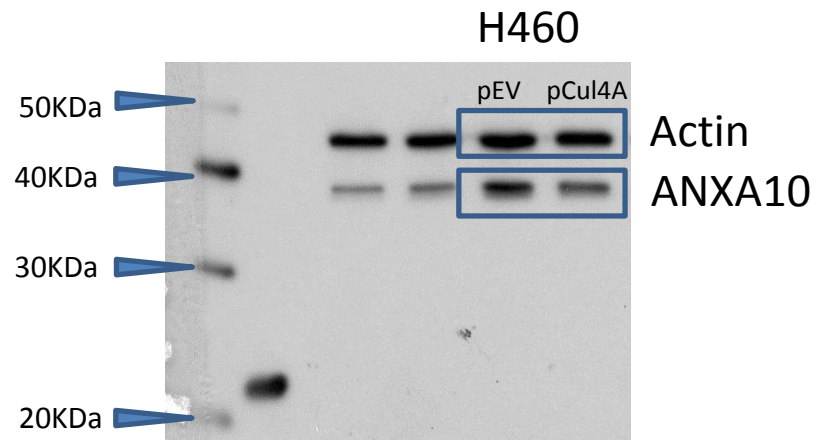

Figure 2D

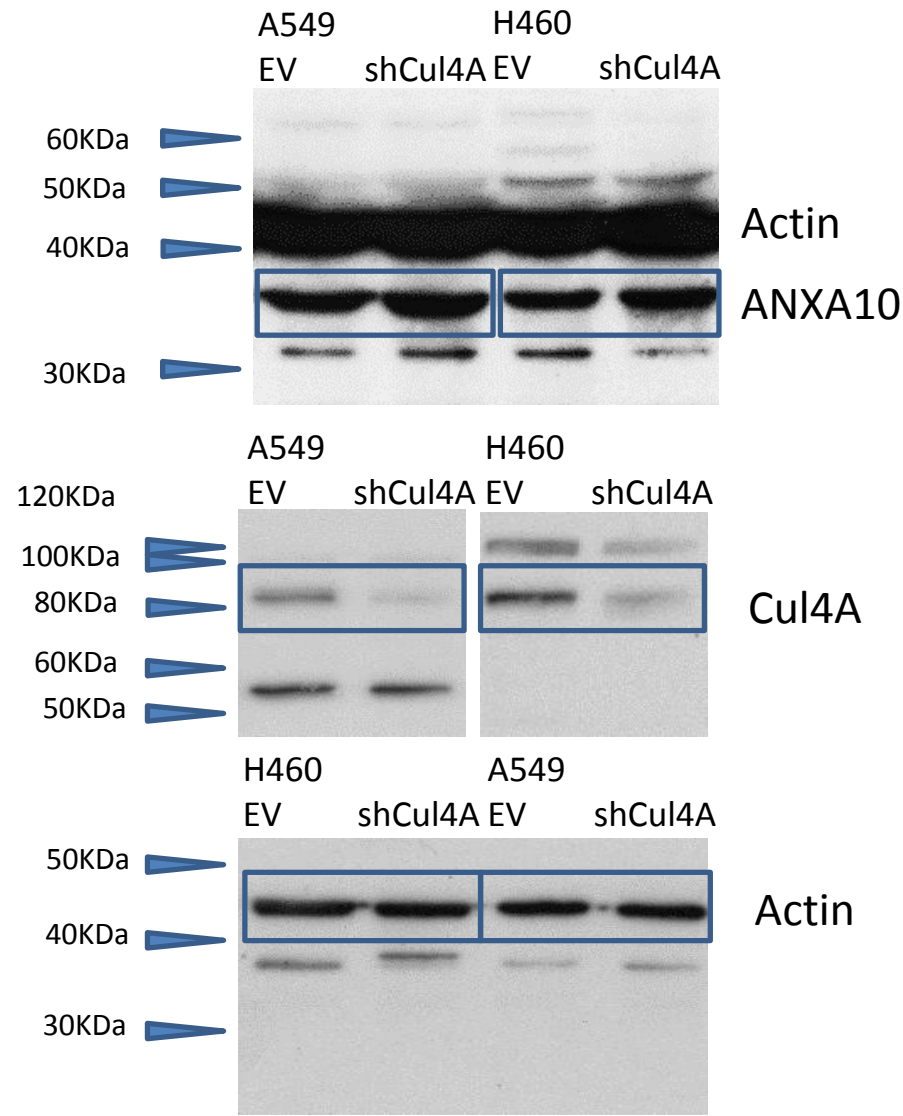

Figure 6A

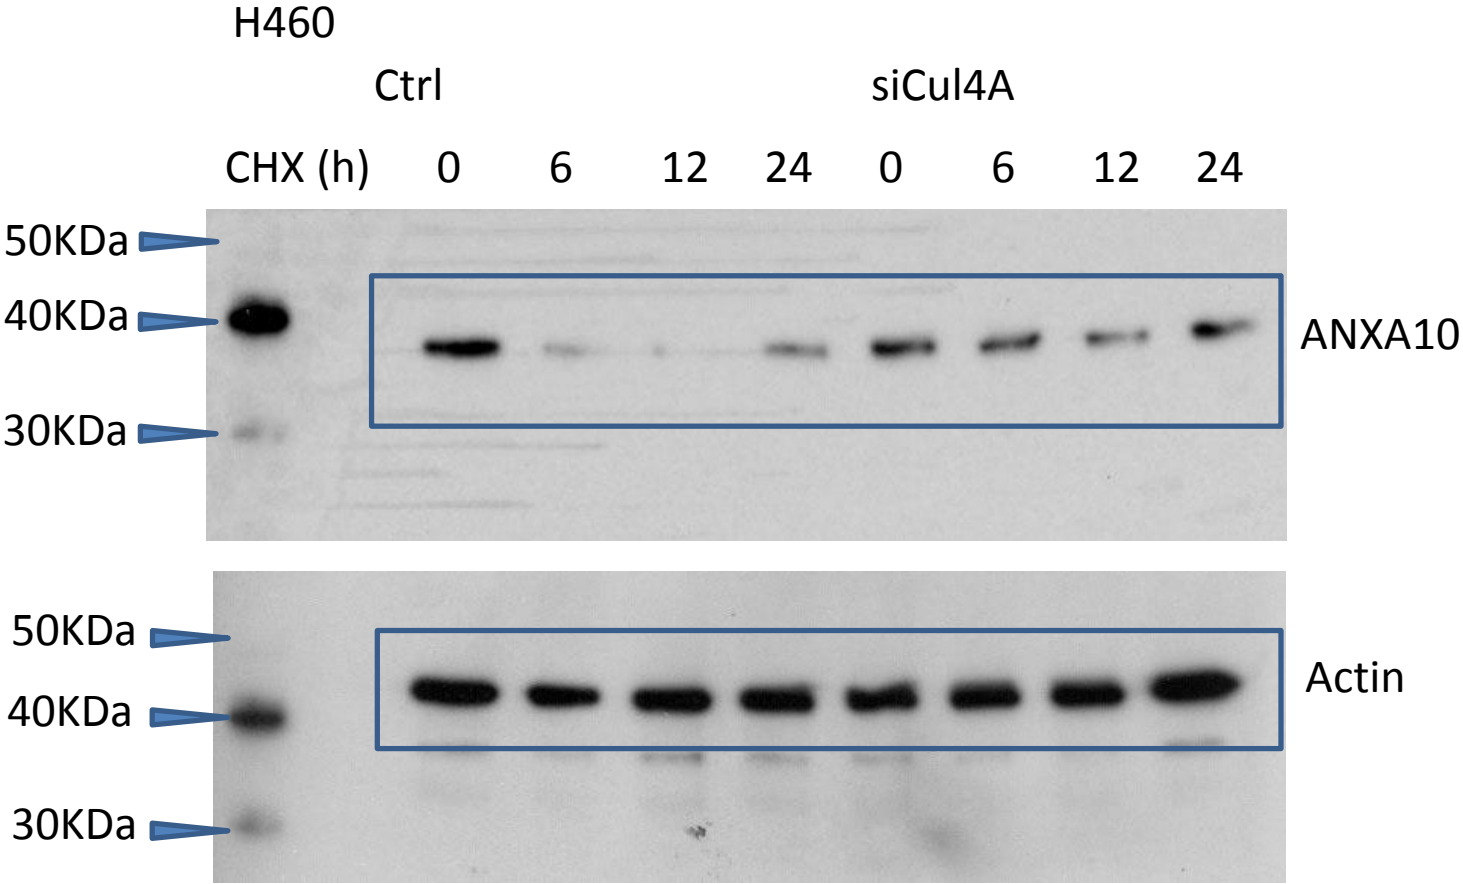

### Figure 6B

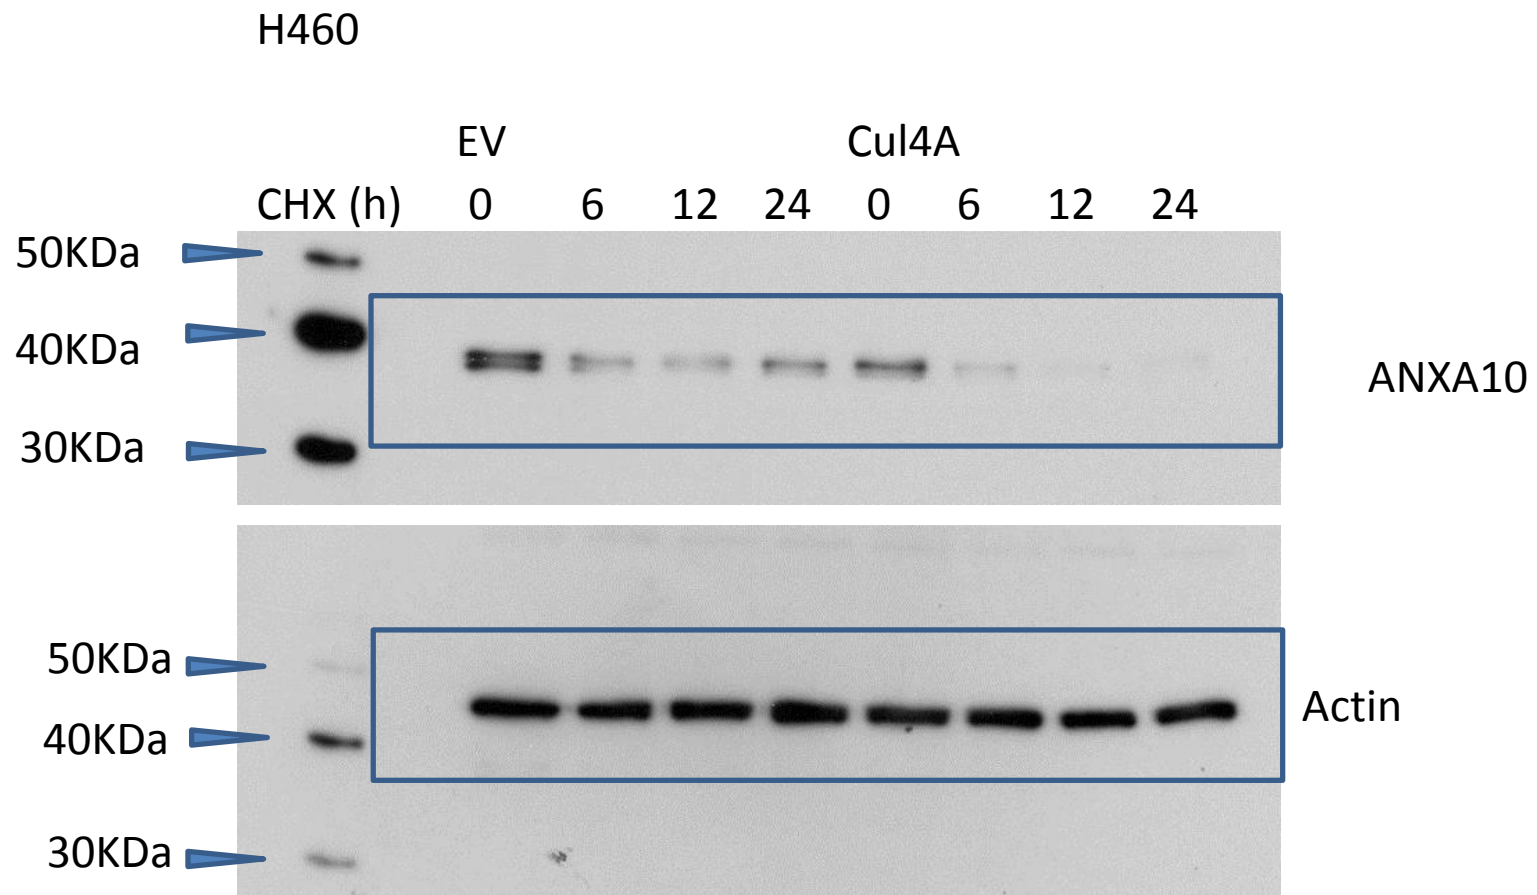



**Figure 6C**

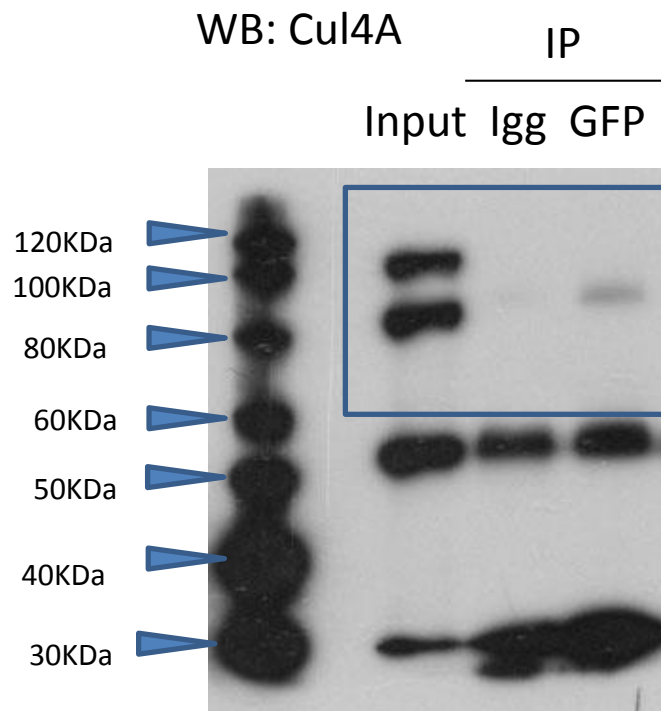

**Figure 6D**

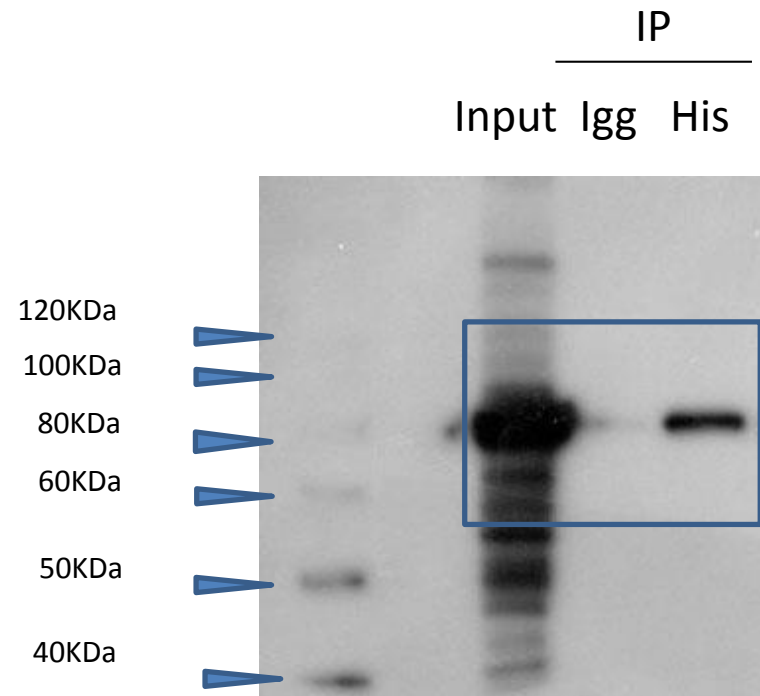

CO-IP: Cul4A-Myc-His/ANXA10-GFP

Figure 6E

|               |   |   |   |   |
|---------------|---|---|---|---|
| Cul4A-Myc-His | - | + | + | + |
| ANXA10-GFP    | - | + | + | + |
| Ubiquitin-HA  | - | + | + | + |

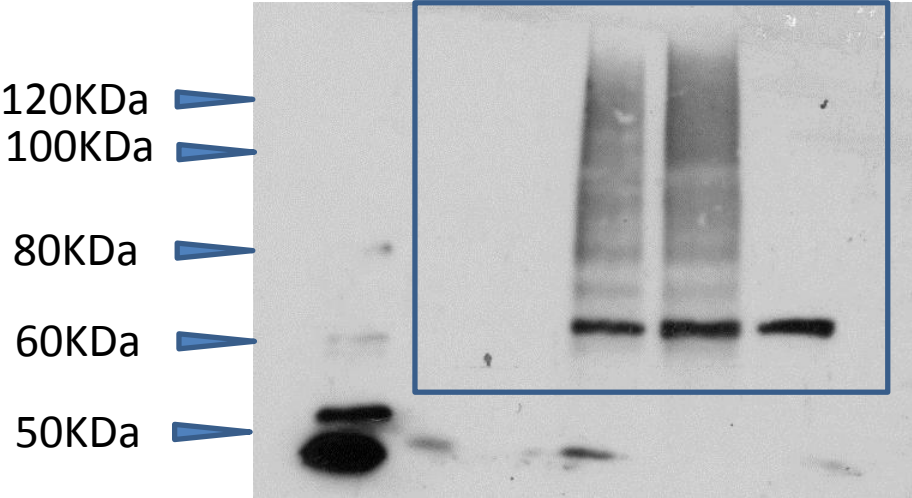



**Figure 6F**

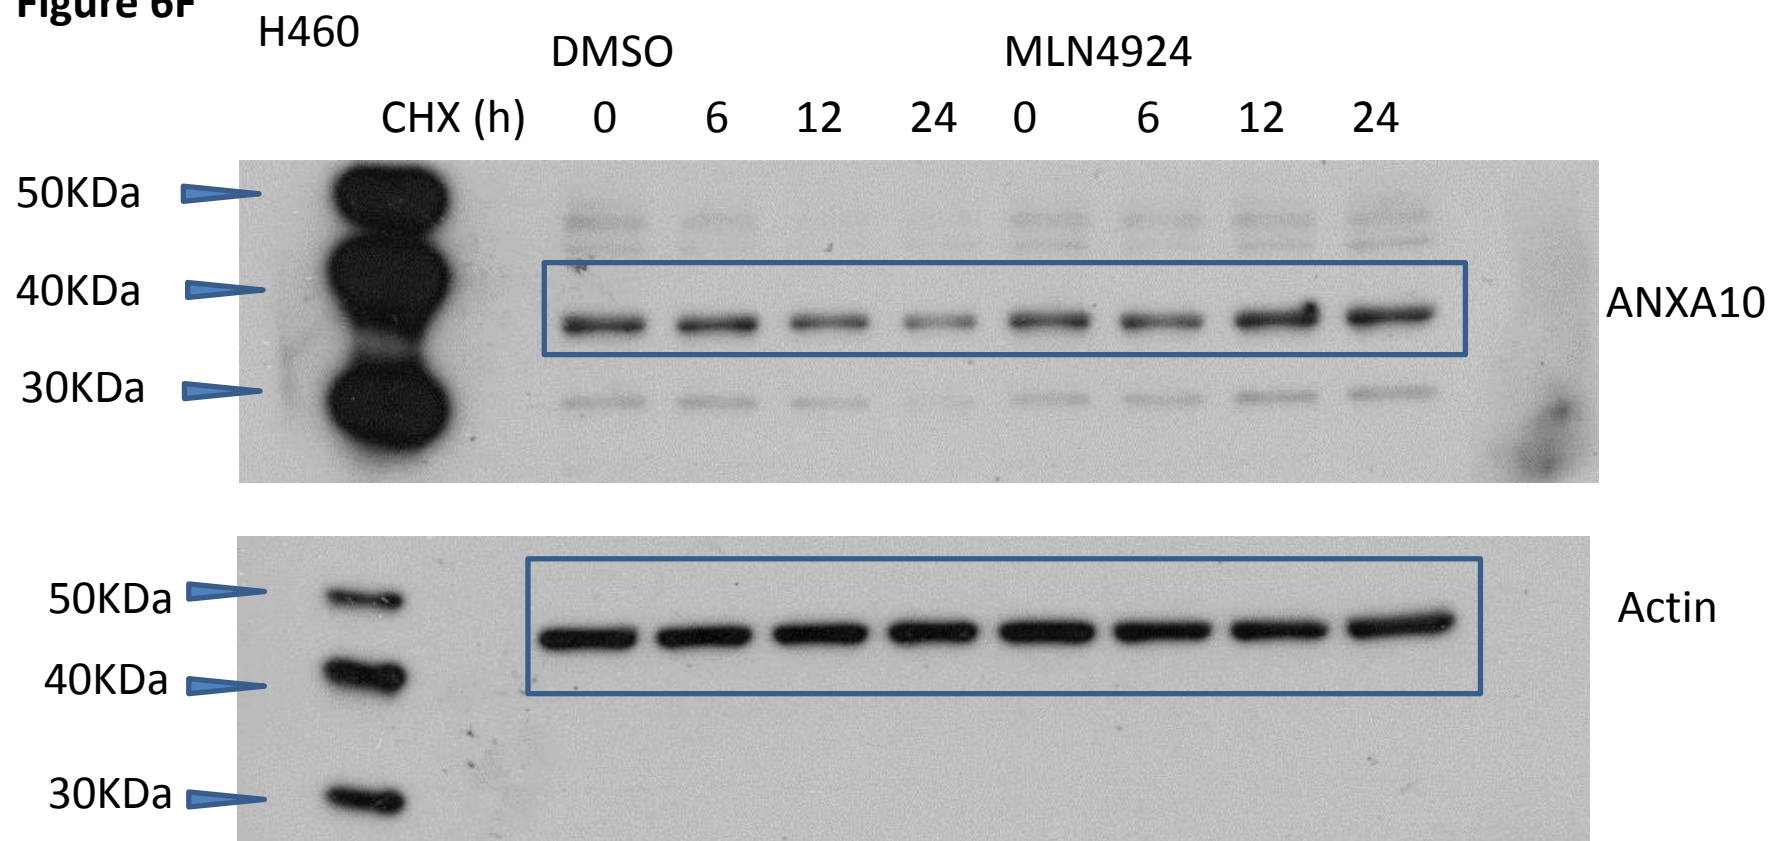

Supplement: s1 [file s1]
